# Supplementary material for: Differential gene expression in Aspergillus fumigatus induced by human platelets in vitro
Source: PubMed Central journal article supplement (PMC4415150; doi:10.1016/j.ijmm.2015.01.002), 2015-05
Supplement: mmc1.pdf [file mmc1.pdf]

**Supplemental Table 1. Differentially expressed *Aspergillus fumigatus* genes after incubation with platelets for the times indicated expressed as Log 2 relative fold change.**

| Locus      | Protein name                                                 | 15 min       | 30 min       | 1 h          | 3 h          |
|------------|--------------------------------------------------------------|--------------|--------------|--------------|--------------|
| Afu1g01410 | hypothetical protein                                         | -0.99        | -0.95        | <b>-1.18</b> | -0.67        |
| Afu1g01530 | GrpB domain protein                                          | 0.44         | <b>1.23</b>  | 0.75         | -0.09        |
| Afu1g01640 | kinesin family protein                                       | <b>1.18</b>  | 0.67         | <b>2.22</b>  | -0.12        |
| Afu1g01680 | branched-chain amino acid aminotransferase                   | 0.68         | <b>1.57</b>  | <b>1.61</b>  | -0.58        |
| Afu1g01940 | hypothetical protein                                         | 0.35         | -0.02        | -0.11        | <b>1.03</b>  |
| Afu1g01950 | hypothetical protein                                         | -0.37        | -0.22        | <b>1.17</b>  | -0.48        |
| Afu1g02070 | cytochrome C1/Cyt1                                           | -0.16        | <b>-1.03</b> | <b>-1.11</b> | -0.10        |
| Afu1g02110 | Phe-inhibited DAHP synthase AroG                             | -0.38        | 0.05         | 0.53         | <b>-1.09</b> |
| Afu1g02610 | rRNA processing protein                                      | -0.66        | <b>-1.10</b> | -0.19        | -0.02        |
| Afu1g02630 | rRNA processing protein Pwp1                                 | -0.72        | <b>-1.07</b> | 0.10         | <b>-1.12</b> |
| Afu1g02985 | hypothetical protein                                         | -0.21        | <b>1.14</b>  | <b>1.24</b>  | -0.13        |
| Afu1g03500 | topoisomerase I                                              | 0.70         | <b>1.01</b>  | <b>1.32</b>  | 0.31         |
| Afu1g03800 | C6 transcription factor                                      | -0.62        | -0.81        | -0.91        | <b>-1.15</b> |
| Afu1g03950 | cytochrome P450 sterol C-22 desaturase, putative             | -0.61        | <b>-1.44</b> | <b>-1.56</b> | -0.45        |
| Afu1g04430 | hypothetical protein                                         | <b>2.18</b>  | 0.26         | -0.35        | <b>2.66</b>  |
| Afu1g04540 | NADH-cytochrome b5 reductase                                 | 0.69         | -0.88        | <b>-1.13</b> | 0.48         |
| Afu1g04860 | rhodopsin family protein                                     | 0.43         | <b>1.05</b>  | <b>1.72</b>  | 0.26         |
| Afu1g05130 | PH domain protein                                            | -0.16        | <b>1.13</b>  | <b>1.29</b>  | -0.76        |
| Afu1g05210 | G-protein complex gamma subunit GpgA                         | -0.15        | <b>-1.58</b> | <b>-1.63</b> | 0.54         |
| Afu1g05310 | nucleolar ATPase Kre33                                       | -0.90        | <b>-1.20</b> | -0.30        | -0.43        |
| Afu1g05370 | hypothetical protein                                         | -0.30        | <b>1.38</b>  | 0.55         | -0.35        |
| Afu1g05460 | hypothetical protein                                         | 0.78         | 0.70         | <b>1.46</b>  | 0.93         |
| Afu1g05600 | hypothetical protein                                         | 0.96         | <b>1.26</b>  | 0.49         | 0.69         |
| Afu1g05690 | hypothetical protein                                         | 0.89         | 0.27         | -0.29        | <b>1.07</b>  |
| Afu1g06100 | glutaredoxin Grx1                                            | 0.01         | 0.44         | <b>1.26</b>  | -0.03        |
| Afu1g06280 | short-chain dehydrogenase/reductase family protein, putative | <b>1.39</b>  | 0.85         | 0.84         | <b>1.79</b>  |
| Afu1g06350 | pathogenesis associated protein Cap20                        | <b>1.26</b>  | <b>3.52</b>  | <b>2.92</b>  | 0.19         |
| Afu1g06600 | 60S ribosome biogenesis protein Rrp14                        | -0.88        | -0.83        | 0.11         | <b>-1.03</b> |
| Afu1g07750 | SWIRM domain protein Fun19                                   | -0.48        | <b>1.05</b>  | <b>1.02</b>  | -0.96        |
| Afu1g08930 | WD repeat protein                                            | 0.28         | 0.59         | <b>1.03</b>  | 0.50         |
| Afu1g09270 | transmembrane glycoprotein                                   | <b>-1.46</b> | -0.21        | -0.33        | -0.40        |
| Afu1g09380 | hypothetical protein                                         | 0.37         | 0.28         | <b>1.15</b>  | 0.20         |
| Afu1g09510 | GPI anchored serine-threonine rich protein                   | 0.38         | <b>-1.14</b> | <b>-1.67</b> | <b>1.61</b>  |
| Afu1g09530 | hypothetical protein                                         | 0.51         | <b>1.10</b>  | 0.70         | 0.74         |
| Afu1g09540 | vacuolar transporter chaperon Vtc1                           | 0.43         | 0.73         | 0.42         | <b>1.03</b>  |
| Afu1g09550 | dynein light chain (Tctex1)                                  | 0.30         | -0.47        | <b>-1.12</b> | 0.81         |
| Afu1g09570 | hypothetical protein                                         | -0.11        | 0.68         | <b>1.23</b>  | 0.10         |
| Afu1g09590 | hypothetical protein                                         | <b>1.10</b>  | 0.94         | <b>2.45</b>  | 0.41         |
| Afu1g09660 | mitochondrial 2-oxodicarboxylate carrier protein, putative   | 0.00         | -0.98        | <b>-1.12</b> | -0.01        |
| Afu1g09670 | HLH transcription factor (GlcD gamma)                        | -0.01        | <b>1.41</b>  | <b>1.49</b>  | -0.77        |
| Afu1g09690 | tRNA ligase                                                  | 0.00         | <b>1.60</b>  | <b>1.96</b>  | <b>-1.25</b> |
| Afu1g09700 | ankyrin repeat protein                                       | -0.70        | <b>1.95</b>  | <b>2.60</b>  | <b>-1.01</b> |

|            |                                                                |              |              |              |              |
|------------|----------------------------------------------------------------|--------------|--------------|--------------|--------------|
| Afu1g09710 | hypothetical protein                                           | 0.43         | 0.78         | <b>1.58</b>  | -0.42        |
| Afu1g09770 | La domain family                                               | <b>-1.28</b> | <b>-1.15</b> | -0.11        | -0.94        |
| Afu1g10190 | pre-mRNA splicing factor (Prp31)                               | -0.02        | <b>1.15</b>  | <b>1.92</b>  | -0.03        |
| Afu1g10200 | cell cycle control protein (Cwf4)                              | 0.14         | <b>1.07</b>  | <b>1.34</b>  | -0.40        |
| Afu1g10340 | integral membrane protein, Mpv17/PMP22 family                  | 0.83         | <b>1.46</b>  | <b>1.69</b>  | 0.73         |
| Afu1g10410 | DNA repair protein RAD51                                       | 0.40         | 0.46         | <b>1.12</b>  | 0.51         |
| Afu1g10470 | hypothetical protein                                           | -0.16        | 0.35         | <b>1.01</b>  | -0.37        |
| Afu1g10560 | GTP binding protein                                            | -0.53        | -0.96        | 0.53         | <b>-1.23</b> |
| Afu1g10710 | mRNA splicing protein (Prp5)                                   | 0.44         | <b>1.77</b>  | <b>1.72</b>  | 0.48         |
| Afu1g10850 | ubiquitin-like modifier SUMO                                   | 0.67         | 0.75         | <b>1.53</b>  | <b>1.36</b>  |
| Afu1g10860 | nuclear pore complex protein Nup107                            | <b>-1.11</b> | -0.59        | -0.04        | -0.40        |
| Afu1g10990 | ribosomal RNA processing protein                               | 0.44         | 0.35         | <b>1.00</b>  | 0.21         |
| Afu1g11000 | C6 transcription factor                                        | 0.08         | <b>1.21</b>  | <b>1.02</b>  | -0.52        |
| Afu1g11030 | xylitol dehydrogenase                                          | -0.40        | <b>-1.21</b> | -0.28        | -0.66        |
| Afu1g11120 | hypothetical protein                                           | 0.78         | 0.78         | <b>1.34</b>  | 0.65         |
| Afu1g11200 | hypothetical protein                                           | 0.47         | 0.67         | <b>1.34</b>  | -0.11        |
| Afu1g11715 | hypothetical protein                                           | <b>-1.22</b> | -0.73        | -0.41        | -0.45        |
| Afu1g11900 | PQ loop repeat protein                                         | 0.05         | <b>2.43</b>  | <b>2.07</b>  | -0.43        |
| Afu1g12030 | hypothetical protein                                           | 0.88         | <b>1.45</b>  | <b>1.48</b>  | 0.38         |
| Afu1g12170 | translation elongation factor EF-Tu                            | -0.44        | <b>-1.37</b> | <b>-1.36</b> | 0.16         |
| Afu1g12290 | NADH-ubiquinone oxidoreductase 19 kDa subunit                  | -0.20        | <b>-1.50</b> | <b>-1.70</b> | -0.39        |
| Afu1g12800 | isocitrate dehydrogenase, NAD-dependent                        | -0.10        | <b>-1.39</b> | <b>-1.68</b> | -0.29        |
| Afu1g13040 | possible dual specificity protein phosphatase 3                | -0.30        | <b>2.04</b>  | <b>1.81</b>  | -0.70        |
| Afu1g13060 | regulator of nonsense transcripts                              | 0.18         | 0.13         | <b>1.03</b>  | -0.68        |
| Afu1g13090 | anthranilate synthase multifunctional protein TrpC, putative   | -0.48        | -0.14        | 0.01         | <b>-1.13</b> |
| Afu1g13200 | hypothetical protein                                           | <b>-1.16</b> | -0.57        | -0.38        | -0.56        |
| Afu1g13220 | cytochrome P450 pisatin demethylase                            | 0.90         | -0.19        | 0.01         | <b>1.84</b>  |
| Afu1g13230 | hypothetical protein                                           | 0.47         | <b>2.22</b>  | <b>2.81</b>  | <b>-1.57</b> |
| Afu1g13300 | GTP cyclohydrolase II                                          | 0.06         | <b>1.34</b>  | 0.72         | -0.15        |
| Afu1g13310 | bZIP transcription factor                                      | 0.19         | <b>1.98</b>  | <b>2.13</b>  | -0.14        |
| Afu1g13370 | aflatoxin B1-aldehyde reductase GliO-like                      | 0.71         | <b>1.35</b>  | 0.45         | 0.84         |
| Afu1g13430 | hypothetical protein                                           | -0.73        | -0.37        | <b>-1.40</b> | -0.28        |
| Afu1g13460 | hypothetical protein                                           | -0.39        | 0.56         | <b>1.22</b>  | -0.58        |
| Afu1g13490 | spermidine synthase                                            | -0.36        | <b>-1.56</b> | <b>-1.30</b> | -0.40        |
| Afu1g13570 | small nuclear ribonucleoprotein complex protein Nhp2, putative | -0.26        | <b>-1.22</b> | -0.24        | -0.44        |
| Afu1g13870 | alpha-1,2-mannosyltransferase (Alg9)                           | <b>-1.30</b> | -0.26        | -0.49        | -0.10        |
| Afu1g13900 | DNA-directed RNA polymerase I subunit (Rpa190), putative       | -0.33        | <b>-1.06</b> | -0.07        | <b>-1.01</b> |
| Afu1g14060 | C2H2 finger domain protein                                     | 0.32         | <b>1.66</b>  | <b>2.20</b>  | 0.04         |
| Afu1g14120 | nuclear segregation protein (Bfr1)                             | -0.31        | <b>-1.57</b> | -0.93        | 0.09         |
| Afu1g14550 | Mn superoxide dismutase MnSOD                                  | -0.41        | -0.97        | <b>-1.96</b> | -0.31        |
| Afu1g14570 | phosphoribosyl-AMP cyclohydrolase                              | -0.48        | <b>-1.16</b> | <b>-1.14</b> | -0.57        |
| Afu1g14750 | C2H2 transcription factor (Sfp1)                               | 0.31         | 0.42         | <b>1.02</b>  | 0.40         |
| Afu1g15030 | SDA1 domain protein                                            | -0.58        | <b>-1.07</b> | -0.01        | -0.85        |
| Afu1g15160 | hypothetical protein                                           | 0.62         | <b>1.10</b>  | 0.88         | 0.83         |
| Afu1g15220 | hypothetical protein                                           | -0.07        | -0.79        | <b>-1.20</b> | -0.17        |

|            |                                                                                      |              |              |              |              |
|------------|--------------------------------------------------------------------------------------|--------------|--------------|--------------|--------------|
| Afu1g15300 | choline transport protein                                                            | -0.84        | -0.88        | -0.55        | <b>-1.07</b> |
| Afu1g15830 | hypothetical protein                                                                 | <b>1.12</b>  | <b>1.22</b>  | <b>1.52</b>  | <b>1.25</b>  |
| Afu1g16280 | mitochondrial F1F0-ATP synthase g subunit                                            | 0.16         | -0.99        | <b>-1.40</b> | 0.32         |
| Afu1g16450 | hypothetical protein                                                                 | -0.71        | -0.65        | -0.19        | <b>-1.66</b> |
| Afu1g16550 | dihydrouridine synthase family protein                                               | -0.99        | -0.30        | 0.56         | <b>-1.59</b> |
| Afu1g16564 | DUF455 domain protein                                                                | -0.10        | 0.97         | <b>2.78</b>  | 0.33         |
| Afu1g16570 | MIND kinetochore complex component Mtw1                                              | -0.02        | <b>2.07</b>  | <b>2.40</b>  | -0.18        |
| Afu1g16750 | mitochondrial cation transporter                                                     | -0.15        | -0.27        | <b>-1.02</b> | -0.50        |
| Afu1g16840 | TCTP family protein                                                                  | 0.58         | 0.17         | <b>2.09</b>  | 0.72         |
| Afu1g16940 | DEAD/DEAH box helicase                                                               | -0.60        | 0.51         | <b>1.11</b>  | -0.56        |
| Afu1g17270 | FRE family ferric-chelate reductase                                                  | <b>-1.00</b> | -0.94        | -0.48        | -0.08        |
| Afu1g17400 | peptidase S41 family protein                                                         | 0.27         | -0.36        | <b>-1.17</b> | <b>1.57</b>  |
| Afu1g17460 | C6 transcription factor                                                              | 0.41         | <b>1.25</b>  | <b>1.12</b>  | 0.11         |
| Afu1g17670 | salicylate hydroxylase                                                               | 0.19         | <b>-1.07</b> | -0.25        | -0.74        |
| Afu2g00570 | GNAT family acetyltransferase                                                        | 0.53         | 0.74         | <b>1.02</b>  | <b>-2.35</b> |
| Afu2g00580 | hypothetical protein                                                                 | 0.56         | <b>2.97</b>  | <b>2.97</b>  | 0.23         |
| Afu2g00790 | hypothetical protein                                                                 | <b>1.14</b>  | <b>2.11</b>  | <b>1.51</b>  | 0.78         |
| Afu2g00930 | xylosidase/glycosyl hydrolase                                                        | 0.65         | <b>1.34</b>  | 0.94         | 0.26         |
| Afu2g00940 | hypothetical protein                                                                 | 0.35         | <b>2.92</b>  | <b>3.15</b>  | -0.13        |
| Afu2g00980 | hypothetical protein                                                                 | 0.12         | <b>1.13</b>  | <b>2.20</b>  | -0.84        |
| Afu2g01110 | hypothetical protein                                                                 | -0.49        | <b>1.63</b>  | <b>1.79</b>  | -0.43        |
| Afu2g01120 | DNA repair protein Ntg1                                                              | -0.65        | 0.93         | <b>1.56</b>  | -0.62        |
| Afu2g01730 | hypothetical protein                                                                 | 0.33         | 0.55         | <b>1.16</b>  | 0.20         |
| Afu2g01920 | glutaminyl-tRNA synthetase                                                           | 0.10         | 0.40         | 0.57         | <b>-1.03</b> |
| Afu2g01980 | nuclear protein (Sgd1)                                                               | -0.33        | <b>-1.08</b> | 0.19         | -0.23        |
| Afu2g02080 | C2H2 finger domain protein                                                           | 0.49         | 0.69         | <b>1.13</b>  | 0.23         |
| Afu2g02290 | 37S ribosomal protein Rsm22                                                          | 0.07         | 0.84         | <b>1.05</b>  | 0.10         |
| Afu2g02310 | actin cortical patch protein Sur7                                                    | -0.42        | -0.27        | <b>-2.24</b> | 0.58         |
| Afu2g02490 | hypothetical protein                                                                 | -0.39        | 0.46         | 0.44         | <b>-1.99</b> |
| Afu2g02530 | casein kinase I                                                                      | <b>-1.82</b> | -0.05        | -0.27        | <b>-1.63</b> |
| Afu2g02590 | aspartyl-tRNA synthetase Dps1                                                        | -0.28        | <b>1.05</b>  | <b>1.13</b>  | -0.53        |
| Afu2g02600 | hypothetical protein                                                                 | -0.06        | <b>1.23</b>  | <b>1.59</b>  | 0.15         |
| Afu2g02890 | tRNA splicing 2' phosphotransferase 1                                                | 0.80         | <b>2.39</b>  | <b>3.18</b>  | -0.31        |
| Afu2g03120 | cell wall glucanase (Utr2)                                                           | -0.47        | <b>-1.18</b> | -0.05        | -0.69        |
| Afu2g03260 | RNA binding protein (Rbm8A)                                                          | -0.98        | 0.17         | -0.11        | <b>-1.32</b> |
| Afu2g04470 | hypothetical protein                                                                 | <b>1.30</b>  | 0.75         | 0.62         | <b>2.31</b>  |
| Afu2g04550 | MFS sugar transporter                                                                | 0.52         | 0.70         | <b>1.05</b>  | 0.24         |
| Afu2g04600 | C6 transcription factor                                                              | <b>-1.10</b> | -0.39        | -0.61        | -0.20        |
| Afu2g04700 | RNA binding effector protein Scp160                                                  | -0.39        | <b>-1.28</b> | <b>-1.31</b> | -0.10        |
| Afu2g05115 | hypothetical protein                                                                 | 0.93         | <b>1.19</b>  | 0.90         | 0.44         |
| Afu2g05180 | NF-X1 finger and helicase domain protein                                             | 0.49         | <b>1.68</b>  | <b>1.50</b>  | <b>-1.35</b> |
| Afu2g05480 | DNA-directed RNA polymerase I 13.1 kDa polypeptide, putative                         | -0.66        | -0.01        | -0.38        | <b>-1.29</b> |
| Afu2g06110 | chromatin remodeling and histone acetyltransferase complexes subunit (Arp4) putative | 0.17         | 0.88         | <b>1.04</b>  | 0.01         |
| Afu2g06150 | protein disulfide isomerase Pdi1                                                     | 0.30         | 0.53         | <b>2.49</b>  | <b>1.36</b>  |

|            |                                                       |              |              |              |              |
|------------|-------------------------------------------------------|--------------|--------------|--------------|--------------|
| Afu2g06200 | hypothetical protein                                  | 0.72         | 0.61         | <b>1.38</b>  | 0.28         |
| Afu2g06290 | nuclear division Rft1 protein                         | 0.24         | <b>1.06</b>  | <b>1.13</b>  | 0.11         |
| Afu2g06310 | ATP-dependent RNA helicase                            | 0.03         | 0.89         | <b>2.32</b>  | 1.00         |
| Afu2g06320 | replication protein A 70 kDa DNA-binding subunit      | 0.71         | <b>1.35</b>  | <b>3.21</b>  | <b>1.35</b>  |
| Afu2g07340 | COP9 subunit 3                                        | -0.20        | 0.24         | <b>1.00</b>  | -0.15        |
| Afu2g07420 | actin-bundling protein Sac6                           | 0.21         | 0.54         | <b>2.28</b>  | 0.88         |
| Afu2g07500 | prolidase pepP                                        | -0.62        | <b>-1.53</b> | <b>-1.10</b> | 0.38         |
| Afu2g07700 | hypothetical protein                                  | 0.56         | 0.62         | <b>1.21</b>  | -0.24        |
| Afu2g08300 | DnaJ domain protein                                   | <b>-1.20</b> | -0.38        | 0.56         | <b>-1.09</b> |
| Afu2g08430 | acetyltransferase, CysE/LacA/LpxA/NodL family         | -0.15        | <b>-1.07</b> | <b>-1.18</b> | -0.06        |
| Afu2g08550 | peptidyl-prolyl cis/trans isomerase                   | 0.25         | <b>1.79</b>  | <b>1.83</b>  | 0.55         |
| Afu2g08590 | 4'-phosphopantetheinyl transferase NpgA/CfwA          | -0.55        | <b>-1.18</b> | -0.35        | -0.17        |
| Afu2g08750 | mitochondrial inner membrane nuclease Nuc1            | 0.25         | 0.74         | <b>1.17</b>  | -0.21        |
| Afu2g08820 | hypothetical protein                                  | <b>1.30</b>  | 0.31         | 0.11         | <b>1.09</b>  |
| Afu2g09030 | secreted dipeptidyl peptidase DppV                    | <b>1.13</b>  | -0.43        | <b>-1.06</b> | <b>1.88</b>  |
| Afu2g09430 | hypothetical protein                                  | <b>2.01</b>  | 0.26         | -0.65        | <b>2.04</b>  |
| Afu2g09480 | hypothetical protein                                  | 0.84         | 0.56         | <b>1.11</b>  | 0.74         |
| Afu2g09510 | hypothetical protein                                  | -0.67        | 0.20         | 0.34         | <b>-1.53</b> |
| Afu2g09710 | protein kinase (NpkA)                                 | 0.83         | 0.57         | <b>1.29</b>  | 0.23         |
| Afu2g09940 | hypothetical protein                                  | -0.34        | <b>-1.10</b> | -0.17        | -0.04        |
| Afu2g10070 | carbamoyl-phosphate synthase, large subunit           | -0.76        | <b>-1.32</b> | <b>-1.46</b> | -0.44        |
| Afu2g10310 | DUF408 domain protein                                 | 0.49         | <b>1.21</b>  | <b>1.48</b>  | -0.36        |
| Afu2g10330 | hypothetical protein                                  | -0.30        | <b>2.42</b>  | <b>2.80</b>  | -0.15        |
| Afu2g10420 | branched-chain amino acid aminotransferase, cytosolic | -0.47        | -0.65        | <b>-1.47</b> | <b>-1.53</b> |
| Afu2g10640 | SAGA complex subunit (Ada2)                           | 0.28         | 0.45         | <b>1.15</b>  | 0.42         |
| Afu2g10830 | hypothetical protein                                  | 0.36         | 0.40         | 0.82         | <b>1.00</b>  |
| Afu2g11020 | triosephosphate isomerase                             | <b>1.16</b>  | -0.56        | -0.26        | <b>1.51</b>  |
| Afu2g11040 | U-box domain protein                                  | <b>-1.14</b> | 0.61         | -0.01        | <b>-1.94</b> |
| Afu2g11270 | alpha-1,3-glucan synthase Ags2                        | <b>-1.04</b> | -0.47        | -0.40        | -0.50        |
| Afu2g11450 | rRNA processing protein Rrp8                          | -0.02        | 0.06         | <b>1.22</b>  | 0.05         |
| Afu2g11510 | nucleolar GTP-binding protein (Nog1)                  | <b>-1.23</b> | <b>-1.29</b> | 0.14         | <b>-1.41</b> |
| Afu2g11730 | Protein kinase domain-containing protein              | <b>-1.30</b> | <b>-1.33</b> | -0.10        | -0.60        |
| Afu2g12470 | acetylornithine aminotransferase                      | -0.34        | <b>1.13</b>  | <b>1.10</b>  | -0.63        |
| Afu2g12540 | hypothetical protein                                  | 0.86         | 0.70         | 0.54         | <b>1.14</b>  |
| Afu2g12590 | Lectin C-type domain protein                          | 0.04         | <b>1.26</b>  | <b>1.08</b>  | 0.12         |
| Afu2g12630 | allergenic cerato-platanin Asp F13                    | <b>1.51</b>  | <b>1.45</b>  | <b>1.88</b>  | 0.50         |
| Afu2g12680 | hypothetical protein                                  | <b>1.01</b>  | 0.45         | <b>1.03</b>  | 0.02         |
| Afu2g12770 | alpha-L-arabinofuranosidase                           | -0.59        | <b>-1.09</b> | -0.21        | -0.52        |
| Afu2g13320 | mitochondrial membrane fission protein (Fis1)         | 0.70         | 0.42         | <b>1.07</b>  | <b>1.21</b>  |
| Afu2g13400 | membrane protein TMS1                                 | -0.34        | <b>1.43</b>  | <b>1.21</b>  | -0.88        |
| Afu2g13420 | hypothetical protein                                  | -0.63        | -0.51        | <b>-1.01</b> | -0.35        |
| Afu2g13470 | pyrimidine 5'-nucleotidase                            | 0.98         | <b>2.00</b>  | <b>2.47</b>  | <b>1.11</b>  |
| Afu2g13710 | NADH-ubiquinone oxidoreductase 49 kDa subunit         | -0.96        | -0.61        | 0.01         | <b>-1.20</b> |
| Afu2g13830 | hypothetical protein                                  | -0.28        | <b>1.57</b>  | 0.32         | 0.20         |
| Afu2g13870 | mitochondrial carrier protein                         | -0.08        | <b>1.09</b>  | <b>1.29</b>  | -0.30        |
| Afu2g13890 | annexin ANXC3.2                                       | 0.21         | -0.06        | <b>1.13</b>  | 0.52         |

|            |                                                              |              |              |              |              |
|------------|--------------------------------------------------------------|--------------|--------------|--------------|--------------|
| Afu2g13930 | hypothetical protein                                         | 0.16         | <b>1.96</b>  | <b>2.24</b>  | -0.72        |
| Afu2g13940 | hypothetical protein                                         | -0.23        | <b>2.01</b>  | <b>1.93</b>  | 0.00         |
| Afu2g13970 | hypothetical protein                                         | 0.65         | <b>2.23</b>  | <b>2.19</b>  | -0.27        |
| Afu2g14090 | extragenic suppressor of the bimD6 mutation                  | 0.14         | <b>1.87</b>  | <b>2.33</b>  | -0.28        |
| Afu2g14370 | hypothetical protein                                         | <b>-1.09</b> | -0.52        | -0.61        | -0.68        |
| Afu2g14760 | BCS1-like ATPase                                             | <b>-1.07</b> | <b>1.67</b>  | <b>2.22</b>  | <b>-1.93</b> |
| Afu2g15110 | C2H2 finger domain protein                                   | 0.67         | <b>3.75</b>  | <b>4.56</b>  | 0.38         |
| Afu2g15165 | hypothetical protein                                         | 0.20         | 0.32         | <b>1.10</b>  | 0.68         |
| Afu2g15200 | hypothetical protein                                         | <b>2.07</b>  | 0.44         | -0.12        | <b>1.86</b>  |
| Afu2g15220 | DNA repair protein Pso2/Snm1                                 | -0.44        | <b>1.06</b>  | <b>1.53</b>  | -0.81        |
| Afu2g15690 | hypothetical protein                                         | 0.26         | 0.35         | <b>1.15</b>  | 0.55         |
| Afu2g15700 | hexokinase family protein XprF                               | <b>1.19</b>  | 0.62         | 0.67         | 0.72         |
| Afu2g15830 | TRAF-like signal transducer                                  | -0.09        | <b>1.07</b>  | <b>1.60</b>  | -0.14        |
| Afu2g15960 | nucleotide binding protein Nbp35                             | 0.05         | 0.64         | <b>1.23</b>  | 0.07         |
| Afu2g16060 | hypothetical protein                                         | <b>-1.21</b> | -0.92        | -0.26        | -0.15        |
| Afu2g16080 | nuclear cohesin complex subunit (Psc3)                       | <b>-1.09</b> | -0.56        | -0.99        | -0.87        |
| Afu2g16360 | DRAP deaminase (Rib2)                                        | 0.21         | <b>2.43</b>  | <b>2.44</b>  | -0.27        |
| Afu2g16370 | 60S ribosomal protein L32                                    | <b>1.11</b>  | <b>1.07</b>  | <b>2.71</b>  | 0.92         |
| Afu2g16390 | hypothetical protein                                         | <b>1.18</b>  | <b>1.03</b>  | 0.69         | <b>1.06</b>  |
| Afu2g16750 | nonsense-mediated mRNA decay protein 3                       | -0.58        | 0.56         | <b>1.63</b>  | -0.87        |
| Afu2g16985 | integral membrane protein                                    | 0.23         | 0.59         | <b>1.11</b>  | 0.11         |
| Afu2g16990 | hypothetical protein                                         | <b>1.17</b>  | <b>2.68</b>  | <b>2.54</b>  | <b>1.12</b>  |
| Afu2g17240 | C2H2 finger domain protein                                   | 0.50         | <b>2.18</b>  | <b>3.30</b>  | -0.03        |
| Afu2g17390 | hypothetical protein                                         | -0.22        | 0.51         | <b>1.38</b>  | -0.14        |
| Afu2g17610 | sulfatase domain protein                                     | 0.54         | <b>1.20</b>  | <b>1.55</b>  | <b>1.20</b>  |
| Afu2g17840 | MFS transporter                                              | -0.24        | <b>-1.95</b> | <b>-2.27</b> | -0.23        |
| Afu3g00560 | hypothetical protein                                         | -0.24        | <b>1.11</b>  | 0.54         | 0.05         |
| Afu3g00720 | DUF500 and UBA/TS-N domain protein                           | 0.28         | -0.10        | <b>2.18</b>  | 0.38         |
| Afu3g00730 | hypothetical protein                                         | 0.50         | 0.06         | <b>1.56</b>  | 0.41         |
| Afu3g00810 | cholestenol delta-isomerase                                  | <b>-1.10</b> | -0.75        | -0.46        | -0.48        |
| Afu3g00850 | hypothetical protein                                         | -0.75        | <b>-1.13</b> | -0.98        | -0.71        |
| Afu3g01070 | tyrosinase                                                   | -0.76        | <b>-1.57</b> | <b>-2.46</b> | -0.96        |
| Afu3g01130 | cell wall protein                                            | -0.58        | <b>-1.04</b> | -0.89        | <b>-1.48</b> |
| Afu3g01150 | GPI anchored cell wall protein                               | <b>1.29</b>  | -0.19        | -0.17        | <b>1.17</b>  |
| Afu3g01196 | hypothetical protein                                         | 0.25         | 0.90         | <b>1.43</b>  | -0.23        |
| Afu3g01260 | acetyltransferase, GNAT family family                        | 0.00         | <b>1.26</b>  | <b>1.20</b>  | -0.62        |
| Afu3g01440 | DUF1212 domain membrane protein                              | 0.56         | <b>1.71</b>  | <b>1.99</b>  | 0.51         |
| Afu3g01530 | phosphatidylglycerol specific phospholipase                  | <b>1.12</b>  | 0.36         | 0.68         | <b>1.02</b>  |
| Afu3g01580 | GMC oxidoreductase                                           | -0.09        | <b>3.90</b>  | <b>3.30</b>  | 0.03         |
| Afu3g02120 | short-chain dehydrogenase/reductase family protein, putative | <b>1.33</b>  | 0.79         | <b>1.37</b>  | <b>1.12</b>  |
| Afu3g02270 | mycelial catalase Cat1                                       | <b>3.41</b>  | 0.17         | -0.31        | <b>3.41</b>  |
| Afu3g03280 | FAD binding monooxygenase                                    | 0.86         | <b>1.25</b>  | 0.40         | -0.06        |
| Afu3g03610 | hypothetical protein                                         | 0.78         | <b>1.00</b>  | <b>2.31</b>  | <b>2.65</b>  |
| Afu3g03750 | hypothetical protein                                         | <b>1.13</b>  | <b>1.13</b>  | <b>1.08</b>  | <b>1.13</b>  |
| Afu3g04200 | N2,N2-dimethylguanosine tRNA methyltransferase               | <b>-1.17</b> | -0.25        | 0.01         | -0.84        |
| Afu3g05420 | mitochondrial tricarboxylate transporter (Ctp), putative     | 0.44         | 0.47         | <b>1.17</b>  | <b>1.03</b>  |

|            |                                                               |              |              |              |              |
|------------|---------------------------------------------------------------|--------------|--------------|--------------|--------------|
| Afu3g05830 | hypothetical protein                                          | 0.82         | <b>1.75</b>  | <b>1.82</b>  | 0.80         |
| Afu3g05860 | exosome complex exonuclease Rrp4                              | <b>-1.04</b> | 0.02         | -0.22        | <b>-1.16</b> |
| Afu3g05940 | transcription factor Rba50                                    | 0.45         | <b>1.99</b>  | <b>1.61</b>  | 0.06         |
| Afu3g06000 | sister chromatid cohesion acetyltransferase Eco1, putative    | -0.05        | 0.83         | <b>1.07</b>  | -0.21        |
| Afu3g06070 | histone H1                                                    | -0.48        | <b>-1.65</b> | <b>-1.45</b> | 0.08         |
| Afu3g06260 | translation initiation factor SUI1                            | 0.18         | <b>1.93</b>  | <b>1.76</b>  | -0.36        |
| Afu3g06290 | C6 transcription factor                                       | <b>-1.32</b> | -0.26        | -0.26        | -0.40        |
| Afu3g06510 | hypothetical protein                                          | -0.11        | -0.67        | <b>-1.27</b> | 0.63         |
| Afu3g06770 | mRNA splicing protein                                         | -0.08        | <b>2.02</b>  | <b>2.18</b>  | -0.01        |
| Afu3g07330 | essential protein Yae1                                        | <b>-1.12</b> | -0.41        | 0.17         | -0.81        |
| Afu3g07600 | hypothetical protein                                          | 0.00         | 0.89         | <b>1.86</b>  | 0.16         |
| Afu3g07610 | hypothetical protein                                          | 0.67         | 0.03         | <b>1.06</b>  | 0.16         |
| Afu3g07820 | proteasome regulatory particle subunit Rpt1                   | 0.61         | 0.49         | <b>1.04</b>  | 0.96         |
| Afu3g07850 | pheromone maturation dipeptidyl aminopeptidase DapB           | <b>-1.28</b> | -0.69        | <b>-1.33</b> | -0.62        |
| Afu3g07870 | extracellular serine-rich protein                             | <b>1.72</b>  | -0.04        | <b>-1.21</b> | <b>1.18</b>  |
| Afu3g07910 | UDP-glucose 4-epimerase                                       | 0.76         | 0.49         | 0.21         | <b>1.11</b>  |
| Afu3g08040 | polymerase (RNA) II (DNA directed) polypeptide D              | 0.43         | <b>1.19</b>  | <b>1.49</b>  | 0.64         |
| Afu3g08090 | 60S ribosomal protein Nsa2                                    | -0.85        | -0.67        | 0.58         | <b>-1.11</b> |
| Afu3g08110 | cell wall protein                                             | -0.32        | -0.84        | <b>-1.63</b> | -0.07        |
| Afu3g08350 | protein transport membrane glycoprotein Sec20                 | 0.18         | 0.98         | <b>1.45</b>  | 0.12         |
| Afu3g08380 | inorganic diphosphatase                                       | 0.52         | 0.43         | <b>2.19</b>  | <b>2.12</b>  |
| Afu3g08390 | tRNA dihydrouridine synthase (Smm1)                           | -0.53        | <b>1.04</b>  | <b>1.46</b>  | -0.79        |
| Afu3g09020 | DNA primase subunit Pri1                                      | 0.45         | 0.17         | <b>1.34</b>  | -0.01        |
| Afu3g09580 | hypothetical protein                                          | -0.15        | <b>-1.13</b> | -0.58        | -0.71        |
| Afu3g09770 | RNA-binding protein (Nab3)                                    | <b>-1.39</b> | -0.40        | -0.13        | -0.59        |
| Afu3g09840 | hypothetical protein                                          | 0.89         | 0.75         | <b>1.02</b>  | 0.35         |
| Afu3g09920 | hypothetical protein                                          | <b>1.24</b>  | <b>1.14</b>  | 1.00         | 0.49         |
| Afu3g10110 | electron transfer flavoprotein-ubiquinone oxidoreductase      | 0.03         | 0.65         | <b>1.05</b>  | -0.06        |
| Afu3g10320 | RING finger domain protein                                    | 0.12         | <b>1.21</b>  | <b>1.30</b>  | -0.66        |
| Afu3g10440 | hypothetical protein                                          | 0.51         | <b>1.58</b>  | 0.79         | 0.28         |
| Afu3g10770 | RTA1 domain protein                                           | 0.14         | <b>1.68</b>  | <b>1.86</b>  | <b>-1.03</b> |
| Afu3g10800 | eukaryotic translation initiation factor 3 subunit CLU1/TIF31 | -0.69        | <b>-2.00</b> | <b>-1.58</b> | -0.21        |
| Afu3g10890 | ATP dependent RNA helicase (Dbp8)                             | -0.94        | -0.75        | 0.79         | <b>-1.22</b> |
| Afu3g11080 | MAP kinase kinase kinase (Bck1)                               | <b>-1.43</b> | <b>-1.03</b> | -0.49        | -0.91        |
| Afu3g11220 | ribonuclease T2 family                                        | <b>-1.37</b> | <b>1.63</b>  | 0.51         | <b>-1.07</b> |
| Afu3g11310 | hypothetical protein                                          | -0.32        | -0.46        | 0.72         | <b>-1.31</b> |
| Afu3g11360 | eukaryotic translation initiation factor 3 subunit EifCe      | 0.36         | 0.22         | <b>1.11</b>  | 0.47         |
| Afu3g11630 | hypothetical protein                                          | 0.25         | <b>1.43</b>  | 0.60         | -0.01        |
| Afu3g12050 | F-box domain protein                                          | 0.03         | <b>1.30</b>  | 0.87         | -0.06        |
| Afu3g12060 | Methionine synthase, vitamin-B12 independent                  | <b>1.02</b>  | <b>1.12</b>  | 0.31         | 0.45         |
| Afu3g12320 | lipase/serine esterase                                        | 0.19         | <b>1.77</b>  | <b>1.75</b>  | 0.09         |
| Afu3g12460 | hypothetical protein                                          | <b>1.04</b>  | 0.22         | 0.38         | 0.40         |
| Afu3g12490 | protein arginine methyltransferase RmtB                       | -0.55        | <b>-1.36</b> | -0.18        | -0.63        |
| Afu3g12680 | hypothetical protein                                          | -0.10        | -0.75        | -0.57        | <b>-1.20</b> |
| Afu3g12710 | hypothetical protein                                          | <b>-1.13</b> | <b>-1.24</b> | -0.44        | -0.71        |
| Afu3g12840 | Signal peptidase I                                            | -0.53        | 0.85         | <b>1.31</b>  | <b>-1.08</b> |

|            |                                                             |              |              |              |              |
|------------|-------------------------------------------------------------|--------------|--------------|--------------|--------------|
| Afu3g12900 | MFS transporter                                             | <b>1.38</b>  | 0.17         | 0.00         | <b>2.25</b>  |
| Afu3g13110 | extracellular serine-threonine rich protein                 | <b>1.04</b>  | <b>-1.18</b> | <b>-1.02</b> | <b>1.65</b>  |
| Afu3g13180 | hypothetical protein                                        | 0.10         | <b>1.48</b>  | <b>1.99</b>  | -0.27        |
| Afu3g13280 | DEAD/DEAH box helicase (Sbp4)                               | -0.83        | <b>-1.54</b> | -0.45        | <b>-1.09</b> |
| Afu3g13510 | flavin containing amine oxidase                             | 0.21         | <b>1.81</b>  | <b>1.26</b>  | 0.49         |
| Afu3g13700 | transferase family protein                                  | 0.40         | <b>-1.05</b> | <b>-1.17</b> | <b>1.02</b>  |
| Afu3g14120 | hypothetical protein                                        | 1.00         | <b>1.06</b>  | 0.73         | <b>1.14</b>  |
| Afu3g14150 | F-box domain protein                                        | 0.85         | <b>2.47</b>  | <b>2.58</b>  | -0.21        |
| Afu3g14590 | copper amine oxidase                                        | 0.14         | -0.99        | <b>-1.44</b> | -0.22        |
| Afu3g15080 | hypothetical protein                                        | -0.38        | <b>2.39</b>  | <b>3.36</b>  | -0.53        |
| Afu4g00160 | short-chain dehydrogenase                                   | <b>-1.55</b> | -0.70        | <b>-1.10</b> | -0.64        |
| Afu4g00200 | F-box domain protein                                        | -0.24        | <b>1.68</b>  | <b>1.80</b>  | <b>-1.12</b> |
| Afu4g00870 | antigenic cell wall galactomannoprotein                     | -0.80        | -0.35        | -0.46        | <b>-1.02</b> |
| Afu4g00970 | IMP-specific 5'-nucleotidase (Isn1)                         | -0.11        | -0.22        | <b>2.18</b>  | -0.10        |
| Afu4g00980 | hypothetical protein                                        | <b>-1.20</b> | 0.86         | <b>1.36</b>  | <b>-1.72</b> |
| Afu4g01140 | MFS multidrug transporter                                   | <b>2.16</b>  | <b>2.23</b>  | <b>1.12</b>  | <b>1.49</b>  |
| Afu4g01210 | hypothetical protein                                        | 0.67         | 0.79         | <b>1.61</b>  | -0.09        |
| Afu4g01420 | spore wall assembly protein Dit1                            | <b>1.20</b>  | -0.28        | -0.65        | <b>1.46</b>  |
| Afu4g01440 | glutathione S-transferase family protein                    | <b>1.09</b>  | 0.34         | 0.66         | 0.43         |
| Afu4g02900 | sensor histidine kinase/response regulator                  | -0.74        | -0.68        | <b>-1.03</b> | -0.25        |
| Afu4g02990 | vesicle-mediated transport protein (Imh1)                   | 0.51         | 0.94         | <b>1.23</b>  | 0.24         |
| Afu4g03120 | mitochondrial cytochrome b2                                 | 0.73         | -0.68        | <b>-1.19</b> | <b>1.63</b>  |
| Afu4g03170 | hypothetical protein                                        | -0.89        | <b>3.24</b>  | <b>2.95</b>  | -0.52        |
| Afu4g03240 | cell wall serine-threonine-rich galactomannoprotein Mp1     | <b>1.76</b>  | <b>1.09</b>  | 0.03         | <b>1.55</b>  |
| Afu4g03320 | membrane bound cation transporter                           | 0.25         | 0.24         | <b>1.45</b>  | 0.91         |
| Afu4g03400 | hypothetical protein                                        | 0.92         | -0.30        | 0.09         | <b>2.19</b>  |
| Afu4g03490 | tripeptidyl-peptidase (TppA)                                | -0.57        | <b>-2.01</b> | <b>-1.78</b> | -0.03        |
| Afu4g03650 | ribosome associated DnaJ chaperone Zuotin                   | -0.13        | 0.48         | <b>1.06</b>  | -0.46        |
| Afu4g03770 | chlorohydrolase family protein                              | -0.78        | <b>1.57</b>  | <b>1.64</b>  | <b>-1.39</b> |
| Afu4g03820 | hypothetical protein                                        | 0.52         | 0.99         | <b>1.09</b>  | 0.71         |
| Afu4g03880 | 60S ribosomal protein L7                                    | -0.89        | <b>-1.17</b> | <b>-1.33</b> | 0.09         |
| Afu4g03940 | ferric-chelate reductase                                    | -0.66        | -0.92        | <b>-1.32</b> | -0.18        |
| Afu4g04480 | hypothetical protein                                        | <b>-1.48</b> | -0.77        | -0.60        | -0.74        |
| Afu4g05870 | oxidoreductase, short-chain dehydrogenase/reductase family  | 0.86         | <b>2.14</b>  | 0.99         | 0.87         |
| Afu4g05900 | hypothetical protein                                        | -0.36        | 0.42         | <b>1.14</b>  | -0.64        |
| Afu4g06010 | peptide alpha-N-acetyltransferase Nat2                      | -0.22        | <b>-1.15</b> | <b>-1.21</b> | -0.28        |
| Afu4g06020 | cyclin dependent kinase inhibitor Pho81                     | -0.07        | <b>-1.14</b> | -0.40        | -0.21        |
| Afu4g06100 | hypothetical protein                                        | 0.60         | <b>1.29</b>  | <b>1.28</b>  | 0.72         |
| Afu4g06410 | hypothetical protein                                        | <b>1.15</b>  | 0.64         | 0.75         | <b>1.21</b>  |
| Afu4g06910 | outer mitochondrial membrane protein porin                  | -0.23        | -0.63        | <b>-1.26</b> | 0.02         |
| Afu4g06930 | methionine aminopeptidase, type II                          | 0.30         | 0.28         | <b>1.86</b>  | 0.64         |
| Afu4g06950 | integral ER membrane protein Scs2                           | -0.21        | 0.59         | <b>1.66</b>  | 0.91         |
| Afu4g07070 | hypothetical protein                                        | <b>1.01</b>  | 0.08         | 0.41         | -0.09        |
| Afu4g07430 | UBX domain protein                                          | -0.01        | <b>1.95</b>  | <b>1.63</b>  | -0.08        |
| Afu4g07490 | hypothetical protein                                        | -0.38        | -0.22        | 0.22         | <b>-1.46</b> |
| Afu4g07500 | small nucleolar ribonucleoprotein complex subunit, putative | <b>-1.09</b> | <b>-1.04</b> | -0.67        | -0.95        |

|            |                                                                |             |              |              |              |
|------------|----------------------------------------------------------------|-------------|--------------|--------------|--------------|
| Afu4g07670 | INO80 chromatin remodeling complex (les1)                      | -0.06       | 0.62         | <b>1.27</b>  | -0.19        |
| Afu4g07680 | hypothetical protein                                           | 0.20        | <b>1.17</b>  | <b>1.07</b>  | 0.23         |
| Afu4g07710 | pyruvate carboxylase                                           | -0.53       | -0.95        | <b>-1.36</b> | -0.53        |
| Afu4g08380 | hypothetical protein                                           | <b>1.29</b> | 0.67         | -0.50        | <b>1.44</b>  |
| Afu4g08420 | hypothetical protein                                           | <b>1.94</b> | -0.33        | 0.31         | <b>2.14</b>  |
| Afu4g08720 | lysophospholipase Plb1                                         | -0.06       | -0.46        | <b>-1.57</b> | -0.46        |
| Afu4g08910 | hypothetical protein                                           | 0.28        | <b>1.71</b>  | <b>1.58</b>  | -0.26        |
| Afu4g08990 | molybdenum cofactor sulfurase protein (HxB)                    | -0.26       | <b>1.58</b>  | <b>1.10</b>  | <b>-1.03</b> |
| Afu4g09100 | DnaJ domain protein                                            | 0.14        | <b>2.09</b>  | <b>2.69</b>  | 0.08         |
| Afu4g09260 | hypothetical protein                                           | <b>2.84</b> | 0.15         | -0.13        | <b>3.03</b>  |
| Afu4g09330 | hypothetical protein                                           | -0.05       | 0.87         | <b>2.04</b>  | 0.48         |
| Afu4g09470 | cytochrome P450 monooxygenase                                  | -0.24       | -0.77        | <b>-1.03</b> | -0.64        |
| Afu4g09760 | hypothetical protein                                           | 0.58        | <b>1.95</b>  | <b>2.24</b>  | 0.74         |
| Afu4g09870 | hypothetical protein                                           | 0.93        | 0.72         | <b>1.27</b>  | 0.57         |
| Afu4g09930 | hypothetical protein                                           | <b>1.12</b> | <b>1.24</b>  | <b>1.31</b>  | <b>1.03</b>  |
| Afu4g10260 | hypothetical protein                                           | -0.02       | 0.51         | <b>1.35</b>  | -0.35        |
| Afu4g10410 | aspartate aminotransferase                                     | 0.38        | -0.12        | -0.17        | <b>1.14</b>  |
| Afu4g10430 | mitochondrial peptidyl-tRNA hydrolase Pth2                     | <b>1.15</b> | <b>1.01</b>  | <b>2.21</b>  | <b>1.66</b>  |
| Afu4g10520 | CSL family zinc finger-containing protein                      | 0.42        | <b>2.75</b>  | <b>3.24</b>  | 0.17         |
| Afu4g10850 | hypothetical protein                                           | -0.94       | <b>-1.01</b> | -0.57        | <b>-1.21</b> |
| Afu4g11130 | hypothetical protein                                           | <b>1.35</b> | <b>1.31</b>  | 0.67         | <b>2.04</b>  |
| Afu4g11320 | hypothetical protein                                           | <b>3.13</b> | <b>1.19</b>  | <b>1.73</b>  | <b>3.04</b>  |
| Afu4g11390 | ubiquinol-cytochrome c reductase complex 17 kd protein         | -0.07       | <b>-1.13</b> | <b>-2.00</b> | 0.17         |
| Afu4g11460 | aminotransferase, classes I and II                             | 0.03        | -0.57        | <b>-1.19</b> | -0.38        |
| Afu4g11490 | hypothetical protein                                           | <b>1.05</b> | 0.70         | 0.20         | <b>1.15</b>  |
| Afu4g11750 | hypothetical protein                                           | 0.76        | 0.55         | <b>2.35</b>  | 0.88         |
| Afu4g11880 | splicing factor 3a subunit 2                                   | -0.02       | <b>1.47</b>  | <b>1.49</b>  | -0.05        |
| Afu4g11930 | formamidopyrimidine-DNA glycosylase                            | -0.11       | -0.48        | 0.08         | <b>-1.11</b> |
| Afu4g11960 | iron-sulfur cluster assembly associated protein Nar1, putative | -0.12       | <b>2.43</b>  | <b>2.21</b>  | -0.58        |
| Afu4g11980 | anthranilate phosphoribosyltransferase                         | 0.83        | <b>1.28</b>  | 0.98         | 0.41         |
| Afu4g12030 | hypothetical protein                                           | -0.55       | <b>-1.04</b> | 0.24         | -0.78        |
| Afu4g12110 | TPR domain protein                                             | -0.69       | <b>-1.27</b> | -0.40        | -0.81        |
| Afu4g12170 | 50S ribosomal protein L2                                       | -0.26       | <b>-1.33</b> | -0.83        | -0.08        |
| Afu4g12350 | hypothetical protein                                           | 0.19        | 0.94         | <b>2.21</b>  | 0.97         |
| Afu4g12500 | hypothetical protein                                           | -0.36       | 0.58         | <b>1.24</b>  | -0.39        |
| Afu4g12550 | hypothetical protein                                           | -0.22       | 0.02         | <b>1.87</b>  | 0.27         |
| Afu4g12720 | phosphoesterase                                                | <b>1.15</b> | 0.74         | <b>1.02</b>  | 0.44         |
| Afu4g12940 | hypothetical protein                                           | 0.94        | 0.71         | <b>1.42</b>  | 0.69         |
| Afu4g13000 | lysine-specific histone demethylase Aof2                       | -0.61       | -0.44        | <b>-1.61</b> | -0.32        |
| Afu4g13360 | endo-1,3(4)-beta-glucanase                                     | <b>1.37</b> | 0.86         | 0.82         | 0.55         |
| Afu4g13490 | AP-3 adaptor complex subunit mu                                | 0.38        | <b>1.26</b>  | 0.55         | 0.57         |
| Afu4g13860 | extracellular salicylate hydroxylase/monooxygenase, putative   | 0.53        | <b>2.27</b>  | <b>1.76</b>  | 0.26         |
| Afu4g13872 | hypothetical protein                                           | -0.50       | -0.52        | <b>-1.12</b> | -0.61        |
| Afu4g14010 | short chain dehydrogenase/reductase family protein             | -0.29       | -0.63        | 0.10         | <b>-1.07</b> |
| Afu4g14030 | hypothetical protein                                           | 0.81        | <b>1.02</b>  | <b>1.67</b>  | 0.10         |
| Afu4g14060 | hypothetical protein                                           | 0.86        | 0.24         | -0.04        | <b>1.00</b>  |



|            |                                                         |              |              |              |              |
|------------|---------------------------------------------------------|--------------|--------------|--------------|--------------|
| Afu4g14175 | hypothetical protein                                    | <b>1.26</b>  | <b>1.94</b>  | <b>2.65</b>  | <b>1.86</b>  |
| Afu4g14250 | hypothetical protein                                    | <b>1.10</b>  | -0.08        | 0.30         | <b>2.29</b>  |
| Afu4g14500 | hypothetical protein                                    | <b>1.07</b>  | 0.67         | -0.50        | <b>1.11</b>  |
| Afu5g00790 | ABC multidrug transporter                               | 0.20         | 0.69         | <b>1.57</b>  | 0.24         |
| Afu5g00800 | hypothetical protein                                    | 0.35         | <b>2.49</b>  | <b>2.20</b>  | -0.48        |
| Afu5g00890 | integral membrane protein                               | 0.30         | 0.31         | <b>1.23</b>  | 0.27         |
| Afu5g01005 | hypothetical protein                                    | <b>1.28</b>  | 0.05         | -0.51        | <b>1.71</b>  |
| Afu5g01010 | hypothetical protein                                    | <b>1.41</b>  | 0.07         | 0.05         | <b>1.57</b>  |
| Afu5g01242 | hypothetical protein                                    | -0.85        | <b>-1.20</b> | <b>-1.02</b> | <b>-1.42</b> |
| Afu5g01300 | integral membrane protein                               | 0.91         | <b>1.41</b>  | <b>1.44</b>  | 0.15         |
| Afu5g01740 | deoxyhypusine synthase                                  | -0.42        | -0.48        | <b>-1.49</b> | -0.30        |
| Afu5g01770 | hypothetical protein                                    | -0.14        | <b>1.08</b>  | <b>1.23</b>  | -0.62        |
| Afu5g01870 | DNA replication factor C subunit Rfc3                   | -0.58        | <b>-1.06</b> | -0.57        | -0.73        |
| Afu5g01920 | GPI anchored protein                                    | <b>1.15</b>  | <b>1.98</b>  | <b>2.69</b>  | 0.82         |
| Afu5g02120 | F-box domain protein                                    | <b>1.03</b>  | 0.62         | 0.44         | <b>1.29</b>  |
| Afu5g02330 | major allergen and cytotoxin AspF1                      | -0.36        | <b>-1.34</b> | <b>-1.46</b> | -0.34        |
| Afu5g02400 | catabolite degradation protein                          | 0.73         | <b>1.25</b>  | <b>1.45</b>  | 0.71         |
| Afu5g02720 | phosphoribosylformylglycinamide synthase                | -0.65        | <b>-1.56</b> | -0.72        | <b>-1.37</b> |
| Afu5g02760 | fatty acid elongase (Gns1)                              | -0.75        | <b>-1.66</b> | <b>-1.65</b> | 0.06         |
| Afu5g03050 | transcriptional regulator Cwf13/SkiP                    | -0.31        | <b>1.14</b>  | <b>1.24</b>  | -0.85        |
| Afu5g03470 | tRNA-guanine transglycosylase family protein            | -0.74        | <b>-1.38</b> | -0.38        | -0.87        |
| Afu5g03510 | PQ loop repeat protein                                  | -0.47        | -0.65        | <b>-1.31</b> | -0.33        |
| Afu5g03560 | glutamyl-tRNA synthetase                                | 0.36         | 0.58         | <b>1.33</b>  | 0.75         |
| Afu5g03700 | hypothetical protein                                    | <b>1.17</b>  | 0.59         | 0.57         | 0.50         |
| Afu5g03790 | ferrooxidoreductase Fet3                                | 0.59         | 0.43         | 0.17         | <b>1.11</b>  |
| Afu5g04040 | hypothetical protein                                    | -0.35        | 0.96         | <b>1.54</b>  | -0.39        |
| Afu5g04050 | scramblase family protein                               | 0.30         | <b>1.78</b>  | <b>1.88</b>  | -0.16        |
| Afu5g04150 | hypothetical protein                                    | -0.08        | 0.93         | <b>1.66</b>  | -0.23        |
| Afu5g04210 | ubiquinol-cytochrome C reductase complex core protein 2 | -0.31        | <b>-1.52</b> | <b>-1.59</b> | -0.31        |
| Afu5g04370 | NADH-ubiquinone oxidoreductase, subunit G               | -0.09        | <b>-1.13</b> | <b>-1.40</b> | -0.03        |
| Afu5g04410 | hypothetical protein                                    | 0.50         | <b>1.24</b>  | <b>2.08</b>  | -0.80        |
| Afu5g05500 | D-3-phosphoglycerate dehydrogenase                      | 0.03         | 0.24         | -0.15        | <b>-1.47</b> |
| Afu5g05630 | 60S ribosomal protein L23                               | -0.13        | -0.13        | <b>1.41</b>  | 0.88         |
| Afu5g05730 | hypothetical protein                                    | 0.59         | <b>1.01</b>  | 0.74         | 0.96         |
| Afu5g05830 | CorA family metal ion transporter                       | -0.83        | -0.65        | <b>-1.20</b> | -0.70        |
| Afu5g05850 | hypothetical protein                                    | -0.10        | <b>1.64</b>  | <b>1.81</b>  | -0.29        |
| Afu5g05930 | RNA processing factor 1                                 | <b>-1.30</b> | 0.10         | 0.62         | <b>-1.10</b> |
| Afu5g05940 | peptidyl-tRNA hydrolase                                 | -0.56        | <b>-1.50</b> | <b>-1.02</b> | 0.04         |
| Afu5g06060 | sulfur metabolism regulator SkpA                        | 0.52         | 0.89         | <b>1.95</b>  | 0.05         |
| Afu5g06070 | ABC multidrug transporter Mdr1                          | 0.31         | <b>2.03</b>  | <b>1.81</b>  | <b>-1.61</b> |
| Afu5g06140 | histone acetyltransferase                               | 0.66         | <b>2.09</b>  | <b>1.99</b>  | 0.48         |
| Afu5g06170 | hypothetical protein                                    | <b>-1.49</b> | 0.02         | 0.51         | <b>-1.63</b> |
| Afu5g06400 | hypothetical protein                                    | <b>-1.50</b> | -0.98        | -0.70        | <b>-1.34</b> |
| Afu5g06540 | NADH-ubiquinone oxidoreductase subunit B17.2            | -0.59        | -0.85        | <b>-1.16</b> | -0.17        |
| Afu5g06560 | hypothetical protein                                    | -0.40        | <b>-1.01</b> | -0.63        | -0.54        |
| Afu5g06780 | carbamoyl-phosphate synthase, small subunit             | -0.70        | -0.39        | -0.41        | <b>-1.03</b> |

|            |                                                                 |              |              |              |              |
|------------|-----------------------------------------------------------------|--------------|--------------|--------------|--------------|
| Afu5g06915 | hypothetical protein                                            | <b>1.01</b>  | 0.87         | 0.99         | 0.54         |
| Afu5g07230 | carboxyphosphoenolpyruvate phosphonmutase-like protein          | -0.62        | -0.63        | -0.19        | <b>-1.04</b> |
| Afu5g07640 | RNA 3'-terminal phosphate cyclase                               | -0.41        | <b>3.81</b>  | <b>4.04</b>  | -0.81        |
| Afu5g07850 | decapping enzyme Dcp1                                           | 0.77         | <b>1.47</b>  | 0.65         | -0.06        |
| Afu5g07902 | hypothetical protein                                            | <b>-1.05</b> | -0.84        | -0.75        | -0.72        |
| Afu5g07960 | C2H2 finger and ankyrin domain protein                          | 0.61         | <b>1.52</b>  | <b>2.90</b>  | 0.01         |
| Afu5g08110 | origin recognition complex subunit 2                            | -0.09        | <b>2.93</b>  | <b>2.89</b>  | -0.63        |
| Afu5g08390 | response regulator                                              | <b>1.21</b>  | <b>1.17</b>  | 0.64         | 0.76         |
| Afu5g08540 | septin AspA                                                     | -0.68        | <b>-1.72</b> | <b>-1.73</b> | 0.06         |
| Afu5g08650 | hypothetical protein                                            | <b>1.52</b>  | 0.62         | <b>1.81</b>  | <b>1.60</b>  |
| Afu5g08730 | hypothetical protein                                            | 0.71         | <b>2.87</b>  | <b>2.91</b>  | -0.28        |
| Afu5g08750 | hypothetical protein                                            | 0.17         | <b>1.70</b>  | <b>1.57</b>  | 0.12         |
| Afu5g08800 | hypothetical protein                                            | <b>2.59</b>  | -0.71        | -0.80        | <b>2.89</b>  |
| Afu5g08870 | hypothetical protein                                            | 0.70         | 0.52         | -0.10        | <b>1.22</b>  |
| Afu5g08890 | homoaconitase LysF                                              | <b>-1.32</b> | -0.94        | <b>-1.10</b> | -0.36        |
| Afu5g08970 | oligosaccharyl transferase subunit (beta)                       | 0.42         | 0.20         | 0.82         | <b>1.15</b>  |
| Afu5g09200 | ubiquitin conjugating enzyme (UbcC)                             | 0.28         | <b>1.77</b>  | <b>1.74</b>  | 0.04         |
| Afu5g09620 | tRNA methyltransferase subunit GCD14                            | 0.10         | 0.38         | <b>1.04</b>  | 0.37         |
| Afu5g10120 | NRPS-like enzyme                                                | 0.43         | <b>1.47</b>  | <b>1.78</b>  | 0.48         |
| Afu5g10240 | hypothetical protein                                            | <b>1.11</b>  | <b>1.52</b>  | <b>1.41</b>  | <b>1.08</b>  |
| Afu5g10250 | hypothetical protein                                            | 0.46         | 0.68         | <b>1.57</b>  | 0.52         |
| Afu5g10290 | fructose-bisphosphate aldolase                                  | -0.11        | -0.46        | <b>-1.09</b> | -0.41        |
| Afu5g10470 | riboflavin aldehyde-forming enzyme                              | <b>-1.21</b> | -0.51        | -0.45        | -0.54        |
| Afu5g10510 | ABC transporter                                                 | -0.24        | -0.05        | -0.11        | <b>-2.01</b> |
| Afu5g10800 | G-patch domain protein                                          | -0.45        | <b>1.22</b>  | <b>1.66</b>  | -0.17        |
| Afu5g11040 | pantoate--beta-alanine ligase                                   | -0.36        | -0.56        | <b>-1.09</b> | 0.51         |
| Afu5g11630 | hypothetical protein                                            | 0.88         | -0.47        | <b>-1.07</b> | 0.69         |
| Afu5g11670 | Leucine carboxyl methyltransferase family                       | -0.96        | <b>-1.08</b> | -0.37        | -0.77        |
| Afu5g11990 | alpha-1,3-mannosyltransferase (Alg3)                            | -0.80        | <b>-1.25</b> | -0.10        | -0.62        |
| Afu5g12010 | serine/threonine protein phosphatase                            | -0.25        | 0.98         | <b>1.05</b>  | -0.14        |
| Afu5g12090 | hypothetical protein                                            | 0.40         | 0.49         | <b>2.22</b>  | <b>1.03</b>  |
| Afu5g12550 | N-acetylglucosaminyl-phosphatidylinositol deacetylase, putative | -0.40        | -0.62        | <b>-1.23</b> | -0.33        |
| Afu5g12580 | GTP binding protein (GTPBP1)                                    | 0.54         | <b>1.93</b>  | <b>1.97</b>  | 0.36         |
| Afu5g12600 | DNA excision repair protein (Rad5)                              | 0.63         | 0.89         | <b>1.21</b>  | 0.00         |
| Afu5g12800 | 50S ribosomal protein L4                                        | -0.96        | -0.87        | <b>-1.17</b> | 0.25         |
| Afu5g12890 | microfibrillar-associated protein MfaP1                         | -0.06        | 0.97         | <b>1.24</b>  | -0.78        |
| Afu5g12895 | ssDNA binding protein Ssb3                                      | 0.01         | <b>1.19</b>  | <b>1.08</b>  | -0.10        |
| Afu5g13060 | DUF1275 domain protein                                          | <b>-1.12</b> | <b>1.24</b>  | 0.34         | <b>-1.23</b> |
| Afu5g13220 | hypothetical protein                                            | -0.04        | <b>1.56</b>  | <b>1.36</b>  | 0.23         |
| Afu5g13300 | aspartic endopeptidase Pep1/aspergillopepsin F                  | 0.30         | 0.24         | -0.24        | <b>1.06</b>  |
| Afu5g13370 | mitochondrial DNA helicase (Pif1)                               | 0.56         | 0.53         | <b>1.53</b>  | 0.17         |
| Afu5g13392 | transmembrane GTPase Fzo1                                       | <b>-1.20</b> | -0.98        | -0.47        | -0.84        |
| Afu5g13750 | calcium binding protein Caleosin                                | 0.92         | 0.83         | 0.48         | <b>1.74</b>  |
| Afu5g13840 | NUDIX domain                                                    | -0.26        | 0.24         | <b>1.20</b>  | -0.14        |

|            |                                                                        |              |              |              |              |
|------------|------------------------------------------------------------------------|--------------|--------------|--------------|--------------|
| Afu5g13920 | Hsp90 binding co-chaperone (Sba1)                                      | 0.31         | <b>1.01</b>  | <b>1.58</b>  | -0.02        |
| Afu5g14510 | beta-lactamase                                                         | 0.73         | 0.05         | 0.00         | <b>1.16</b>  |
| Afu6g00280 | NmrA-like family protein                                               | -0.03        | <b>2.61</b>  | <b>2.04</b>  | -0.52        |
| Afu6g00310 | serine carboxypeptidase (CpdS)                                         | <b>-1.05</b> | <b>-2.93</b> | <b>-3.21</b> | -0.22        |
| Afu6g00520 | hypothetical protein                                                   | <b>1.62</b>  | <b>1.96</b>  | <b>2.03</b>  | <b>2.02</b>  |
| Afu6g00555 | hypothetical protein                                                   | -0.38        | 0.60         | <b>1.46</b>  | 0.11         |
| Afu6g01900 | flavin-binding monooxygenase-like protein                              | 0.96         | -0.61        | -0.37        | <b>1.06</b>  |
| Afu6g02200 | C2HC5 finger protein                                                   | <b>1.21</b>  | <b>1.85</b>  | <b>3.41</b>  | 0.53         |
| Afu6g02380 | ubiquitin C-terminal hydrolase                                         | -0.86        | 0.71         | <b>1.17</b>  | <b>-1.63</b> |
| Afu6g02700 | structural maintenance of chromosome complex subunit SmcA              | 0.34         | 0.29         | <b>1.30</b>  | -0.04        |
| Afu6g02820 | metalloreductase                                                       | <b>-1.71</b> | <b>-1.27</b> | <b>-2.32</b> | -0.52        |
| Afu6g02830 | hypothetical protein                                                   | 0.03         | 0.81         | <b>1.38</b>  | -0.29        |
| Afu6g03350 | GNAT family N-acetyltransferase                                        | -0.04        | 0.60         | <b>1.35</b>  | <b>-2.14</b> |
| Afu6g03460 | hypothetical protein                                                   | <b>1.18</b>  | -1.00        | -0.63        | <b>1.53</b>  |
| Afu6g03660 | onanono-7-onima-8-eninoihitemlysoneda                                  | 0.43         | -0.47        | <b>-1.15</b> | 0.69         |
| Afu6g03680 | hypothetical protein                                                   | <b>1.50</b>  | 0.69         | 0.20         | <b>3.68</b>  |
| Afu6g04100 | Mis6 domain protein                                                    | <b>1.04</b>  | <b>1.04</b>  | 0.37         | 0.89         |
| Afu6g04180 | hypothetical protein                                                   | -0.27        | <b>1.76</b>  | <b>1.31</b>  | -0.67        |
| Afu6g04320 | RNA binding protein                                                    | 0.00         | <b>1.05</b>  | <b>1.36</b>  | -0.33        |
| Afu6g04750 | Hsp70 nucleotide exchange factor (Fes1)                                | <b>-1.06</b> | 0.68         | 0.01         | <b>-1.32</b> |
| Afu6g04800 | lysine decarboxylase-like protein                                      | <b>1.08</b>  | <b>1.65</b>  | <b>2.78</b>  | <b>1.06</b>  |
| Afu6g04970 | phosphoserine aminotransferase                                         | 0.55         | 0.86         | <b>1.37</b>  | <b>-1.02</b> |
| Afu6g05040 | DNA replication factor C subunit Rfc4                                  | -0.84        | <b>-1.15</b> | 0.44         | -0.54        |
| Afu6g06330 | adoMet-dependent tRNA methyltransferase (MTase) complex subunit Trm112 | 0.22         | 0.55         | <b>1.06</b>  | -0.11        |
| Afu6g06750 | 14-3-3 family protein                                                  | 0.19         | <b>-1.10</b> | -0.19        | -0.49        |
| Afu6g06990 | von Willebrand and RING finger domain protein                          | 0.72         | 0.76         | 0.08         | <b>1.00</b>  |
| Afu6g07000 | hypothetical protein                                                   | <b>2.13</b>  | <b>2.51</b>  | <b>1.25</b>  | <b>3.59</b>  |
| Afu6g07020 | SAM and PH domain protein (Boi1)                                       | <b>1.78</b>  | -0.54        | 0.01         | <b>1.74</b>  |
| Afu6g07100 | diphthamide biosynthesis protein Dph2                                  | -0.19        | 0.71         | <b>1.15</b>  | -0.37        |
| Afu6g07120 | nuclear movement protein NudC                                          | 0.44         | <b>1.34</b>  | <b>1.45</b>  | 0.11         |
| Afu6g07200 | hypothetical protein                                                   | <b>1.70</b>  | 0.06         | -0.30        | <b>2.71</b>  |
| Afu6g07370 | hypothetical protein                                                   | <b>2.55</b>  | 0.15         | -0.51        | <b>2.79</b>  |
| Afu6g07390 | isocitrate dehydrogenase LysB                                          | 0.02         | <b>-1.67</b> | <b>-1.24</b> | 0.23         |
| Afu6g07410 | hypothetical protein                                                   | <b>-1.22</b> | -0.51        | -0.46        | <b>-1.04</b> |
| Afu6g07430 | pyruvate kinase                                                        | <b>-1.65</b> | <b>-1.48</b> | <b>-1.20</b> | -0.98        |
| Afu6g07590 | hypothetical protein                                                   | -0.80        | 0.86         | <b>1.26</b>  | <b>-1.01</b> |
| Afu6g07700 | chromosomal organization and DNA repair protein Mms21, putative        | 0.57         | <b>1.34</b>  | <b>1.98</b>  | 0.26         |
| Afu6g07970 | calpain-like protein                                                   | 0.54         | 0.58         | <b>1.46</b>  | 0.67         |
| Afu6g08560 | NRPS-like enzyme                                                       | -0.26        | -0.44        | <b>-1.04</b> | -0.62        |
| Afu6g08570 | DNA damage repair protein Mus42                                        | 0.69         | <b>1.02</b>  | <b>1.05</b>  | 0.28         |
| Afu6g08790 | C6 transcription factor (PrnA)                                         | <b>-1.16</b> | -0.51        | -0.55        | -0.62        |
| Afu6g08860 | sugar isomerase, KpsF/GutQ                                             | 0.60         | <b>1.13</b>  | <b>1.31</b>  | -0.41        |
| Afu6g09315 | hypothetical protein                                                   | 0.57         | 0.56         | <b>-1.22</b> | 0.32         |

|            |                                                               |              |              |              |              |
|------------|---------------------------------------------------------------|--------------|--------------|--------------|--------------|
| Afu6g10280 | hypothetical protein                                          | 0.43         | <b>1.83</b>  | <b>2.13</b>  | 0.76         |
| Afu6g10530 | transcriptional elongation regulator Elc1/Elongin C, putative | 0.45         | <b>1.92</b>  | <b>1.78</b>  | -0.62        |
| Afu6g10790 | MFS amine transporter                                         | -0.10        | 0.91         | 0.69         | <b>-1.06</b> |
| Afu6g10840 | hypothetical protein                                          | -0.09        | <b>1.28</b>  | <b>1.29</b>  | -0.25        |
| Afu6g10890 | actin cytoskeleton organization protein App1                  | 0.76         | <b>1.21</b>  | <b>1.76</b>  | 0.44         |
| Afu6g10940 | hypothetical protein                                          | -0.18        | 0.37         | <b>1.06</b>  | -0.14        |
| Afu6g11070 | DEAD box RNA helicase (Hca4)                                  | -0.30        | -0.69        | 0.11         | <b>-1.43</b> |
| Afu6g11130 | possible replication factor-a protein                         | 0.37         | 0.69         | <b>1.08</b>  | 0.20         |
| Afu6g11160 | isopentenyl-diphosphate delta-isomerase                       | -0.06        | 0.14         | <b>2.41</b>  | 0.43         |
| Afu6g11170 | C2H2 finger domain protein (Ezf)                              | 0.35         | <b>1.09</b>  | <b>1.31</b>  | 0.53         |
| Afu6g11560 | integral membrane protein                                     | -0.01        | <b>2.23</b>  | <b>1.98</b>  | -0.43        |
| Afu6g11720 | hypothetical protein                                          | -0.58        | <b>-1.21</b> | -0.14        | <b>-1.28</b> |
| Afu6g12145 | hypothetical protein                                          | <b>-1.14</b> | -0.17        | -0.51        | -0.76        |
| Afu6g12320 | hypothetical protein                                          | -0.76        | 0.38         | 0.83         | <b>-1.39</b> |
| Afu6g12330 | WD domain protein                                             | -0.09        | <b>1.09</b>  | <b>1.81</b>  | -0.23        |
| Afu6g12540 | RING finger protein                                           | 0.18         | <b>1.70</b>  | <b>2.19</b>  | 0.05         |
| Afu6g12650 | hypothetical protein                                          | 0.51         | <b>2.02</b>  | <b>2.39</b>  | 0.16         |
| Afu6g12790 | NADH-ubiquinone oxidoreductase 39 kDa subunit                 | -0.25        | <b>-1.98</b> | <b>-2.43</b> | -0.22        |
| Afu6g12900 | mitochondrial carrier protein                                 | 0.25         | <b>1.36</b>  | <b>1.00</b>  | -0.54        |
| Afu6g13100 | magnesium dependent phosphatase                               | 0.18         | 0.92         | <b>1.25</b>  | 0.07         |
| Afu6g13150 | hypothetical protein                                          | 0.84         | <b>1.32</b>  | 0.22         | 0.85         |
| Afu6g13210 | oxidoreductase, short-chain dehydrogenase/reductase family    | 0.72         | 0.35         | -0.46        | <b>1.07</b>  |
| Afu6g13310 | 26S proteasome non-ATPase regulatory subunit Nas2, putative   | -0.22        | 0.97         | <b>1.46</b>  | 0.19         |
| Afu6g13346 | hypothetical protein                                          | 0.34         | 0.31         | -0.17        | <b>1.20</b>  |
| Afu6g13640 | hypothetical protein                                          | 0.20         | <b>2.61</b>  | <b>1.94</b>  | 0.00         |
| Afu6g13750 | ferric-chelate reductase                                      | -0.66        | -0.63        | <b>-1.06</b> | 0.33         |
| Afu6g14090 | CFEM domain protein                                           | -0.32        | <b>-2.33</b> | <b>-2.85</b> | -0.01        |
| Afu6g14270 | hypothetical protein                                          | 0.45         | <b>1.58</b>  | 0.84         | 0.26         |
| Afu6g14360 | cytochrome P450 monooxygenase                                 | 0.89         | 0.36         | -0.10        | <b>1.37</b>  |
| Afu6g14490 | beta-glucosidase                                              | <b>-1.29</b> | -0.50        | -0.70        | -0.52        |
| Afu7g00180 | NAD dependent epimerase/dehydratase                           | 0.20         | 0.59         | <b>2.04</b>  | 0.29         |
| Afu7g00310 | hypothetical protein                                          | -0.66        | <b>-1.04</b> | -0.91        | <b>-1.46</b> |
| Afu7g00440 | GABA permease                                                 | 0.89         | -0.03        | -0.26        | <b>1.04</b>  |
| Afu7g00580 | hypothetical protein                                          | <b>1.54</b>  | -0.31        | 0.90         | <b>2.10</b>  |
| Afu7g00820 | hypothetical protein                                          | <b>1.43</b>  | <b>1.12</b>  | 0.83         | <b>1.54</b>  |
| Afu7g01240 | phytase                                                       | 0.48         | -0.79        | <b>-1.23</b> | <b>1.19</b>  |
| Afu7g01620 | hypothetical protein                                          | -0.09        | <b>1.32</b>  | <b>1.37</b>  | 0.20         |
| Afu7g01720 | 3-hydroxymethyl-3-methylglutaryl-Coenzyme A lyase             | 0.74         | <b>1.10</b>  | 0.71         | 0.74         |
| Afu7g01920 | DNA-dependent RNA polymerase II RPB140                        | 0.37         | 0.99         | <b>1.40</b>  | 0.30         |
| Afu7g01930 | GTP-binding protein EsdC                                      | <b>1.83</b>  | -0.51        | -0.28        | <b>2.37</b>  |
| Afu7g01940 | nuclear pore complex subunit Nup85                            | -0.03        | 0.40         | <b>1.24</b>  | 0.23         |
| Afu7g02050 | arrestin (or S-antigen), N-terminal domain protein            | 1.00         | <b>1.25</b>  | <b>1.27</b>  | <b>1.80</b>  |
| Afu7g02070 | AIF-like mitochondrial oxidoreductase (Nfrl)                  | 0.37         | <b>-2.23</b> | <b>-2.20</b> | 0.26         |
| Afu7g02080 | RNA polymerase I subunit Rpa43                                | <b>-1.07</b> | <b>-1.65</b> | -0.39        | <b>-1.14</b> |
| Afu7g02230 | mRNA binding post-transcriptional regulator (Csx1), putative  | -0.73        | <b>-1.28</b> | -0.44        | <b>-1.30</b> |

|            |                                                 |              |              |              |              |
|------------|-------------------------------------------------|--------------|--------------|--------------|--------------|
| Afu7g03830 | DNA repair protein Rad7, protein                | 0.52         | <b>1.99</b>  | <b>2.31</b>  | 0.53         |
| Afu7g03970 | hypothetical protein                            | -0.46        | <b>-1.31</b> | <b>-1.38</b> | 0.17         |
| Afu7g03980 | PCI domain protein                              | -0.60        | -0.43        | -0.16        | <b>-1.03</b> |
| Afu7g04040 | hexokinase                                      | 0.29         | 0.14         | -0.08        | <b>1.00</b>  |
| Afu7g04140 | L-galactose dehydrogenase (L-GalDH)             | 0.66         | <b>1.15</b>  | <b>1.04</b>  | 0.51         |
| Afu7g04290 | amino acid permease (Gap1)                      | <b>1.44</b>  | 0.60         | -0.39        | <b>1.57</b>  |
| Afu7g04500 | ATP phosphoribosyltransferase His1              | -0.65        | <b>-1.69</b> | <b>-1.61</b> | -0.69        |
| Afu7g04530 | alcohol dehydrogenase, zinc-containing          | <b>2.19</b>  | <b>1.01</b>  | 0.83         | 0.29         |
| Afu7g04560 | hypothetical protein                            | -0.21        | -0.55        | <b>-1.07</b> | 0.16         |
| Afu7g04870 | glutamine-serine-proline rich protein           | 0.35         | 0.90         | <b>1.74</b>  | 0.21         |
| Afu7g05370 | septin AspB                                     | -0.27        | -0.61        | <b>-1.32</b> | 0.13         |
| Afu7g05420 | mitochondrial intermembrane space protein Mia40 | -0.08        | <b>-1.03</b> | <b>-1.58</b> | 0.12         |
| Afu7g05730 | hypothetical protein                            | 0.43         | <b>1.05</b>  | 0.78         | -0.02        |
| Afu7g06080 | ubiE/COQ5 methyltransferase                     | <b>1.49</b>  | -0.13        | 0.07         | <b>1.16</b>  |
| Afu7g06270 | cyanamide hydratase                             | 0.76         | -0.22        | 0.00         | <b>1.04</b>  |
| Afu7g06440 | F-box domain protein                            | 0.01         | -0.36        | -0.27        | <b>1.00</b>  |
| Afu7g06630 | cytochrome P450 monooxygenase                   | <b>1.18</b>  | 0.43         | 0.40         | <b>1.08</b>  |
| Afu7g06675 | COG3602 family protein                          | 0.30         | <b>1.15</b>  | <b>1.19</b>  | 0.15         |
| Afu7g06680 | AAA family ATPase                               | <b>2.28</b>  | <b>4.11</b>  | <b>4.40</b>  | 0.07         |
| Afu7g06690 | flavin-containing monooxygenase                 | -0.42        | <b>3.96</b>  | <b>3.72</b>  | -0.49        |
| Afu8g01310 | ferric-chelate reductase (Fre2)                 | <b>1.09</b>  | 0.67         | 0.28         | 0.17         |
| Afu8g01370 | CmcJ-like methyltransferase                     | 0.68         | 0.41         | 0.49         | <b>1.07</b>  |
| Afu8g01390 | glycosyl hydrolase                              | 0.89         | <b>-1.43</b> | <b>-2.07</b> | 0.82         |
| Afu8g01820 | hypothetical protein                            | <b>-1.26</b> | -0.74        | -0.60        | -0.51        |
| Afu8g02060 | glycan biosynthesis protein (PigL)              | -0.28        | -0.75        | <b>-1.04</b> | -0.50        |
| Afu8g02250 | hypothetical protein                            | -0.26        | 0.89         | <b>1.35</b>  | -0.25        |
| Afu8g02490 | hypothetical protein                            | -0.30        | <b>1.96</b>  | <b>2.29</b>  | -0.85        |
| Afu8g02810 | ELMO/CED-12 family protein                      | 0.47         | <b>1.02</b>  | <b>1.09</b>  | 0.56         |
| Afu8g02830 | UPD-GlcNAc transporter (Mnn2-2)                 | 0.24         | -0.73        | <b>-1.43</b> | -0.01        |
| Afu8g02870 | hypothetical protein                            | 0.93         | <b>1.87</b>  | <b>1.37</b>  | 0.34         |
| Afu8g03930 | Hsp70 chaperone (HscA)                          | -0.23        | <b>-1.13</b> | -0.68        | -0.16        |
| Afu8g04030 | LMBR1 domain protein                            | 0.19         | <b>1.04</b>  | 0.76         | 0.38         |
| Afu8g04250 | pentatricopeptide repeat protein                | 0.05         | <b>1.02</b>  | <b>1.51</b>  | -0.52        |
| Afu8g04260 | translocation protein (Sec66)                   | 0.41         | 0.42         | <b>1.99</b>  | 0.88         |
| Afu8g04540 | C6 transcription factor                         | -0.43        | -0.12        | <b>-1.18</b> | -0.38        |
| Afu8g05140 | oxidoreductin                                   | <b>1.07</b>  | <b>1.91</b>  | <b>1.16</b>  | <b>1.10</b>  |
| Afu8g05170 | autophagy protein Apg6                          | 0.58         | <b>1.48</b>  | <b>1.18</b>  | 0.56         |
| Afu8g05330 | methylenetetrahydrofolate dehydrogenase         | -0.59        | <b>-1.38</b> | -0.91        | -0.82        |
| Afu8g05650 | hypothetical protein                            | <b>1.11</b>  | 0.47         | <b>1.67</b>  | <b>1.17</b>  |
| Afu8g05710 | MFS sugar transporter Stl1                      | <b>1.35</b>  | <b>3.73</b>  | <b>3.25</b>  | -0.09        |
| Afu8g05720 | DUF567 domain protein                           | 0.34         | 0.23         | <b>1.44</b>  | 0.29         |
| Afu8g06070 | hypothetical protein                            | 0.10         | <b>-1.18</b> | -0.09        | <b>1.51</b>  |
| Afu8g06405 | isoflavone reductase family protein             | <b>1.17</b>  | 0.83         | 0.29         | <b>1.15</b>  |
| Afu8g07090 | extracellular proline-serine rich protein       | 0.64         | -0.76        | <b>-1.10</b> | 0.90         |
| Afu8g07130 | AhpC/TSA family thioredoxin peroxidase          | 0.16         | <b>-2.02</b> | <b>-2.59</b> | 0.27         |
