# Supplementary material for: Differential gene expression in Aspergillus fumigatus induced by human platelets in vitro
Source: PubMed Central journal article supplement (PMC4415150; doi:10.1016/j.ijmm.2015.01.002), 2015-05
Supplement: mmc2.pdf [file mmc2.pdf]

**Supplemental Table 2.**

| Number of Genes differentially regulated | 15 min     | 30 min      | 1 h         | 3 h        |
|------------------------------------------|------------|-------------|-------------|------------|
| total                                    | 132        | 279         | 371         | 172        |
| annotated GO Biological Process          | 70 (53.0%) | 137 (49.1%) | 171 (46.1%) | 86 (50.0%) |
| annotated FunCat                         | 69 (52.3%) | 167 (59.9%) | 223 (60.1%) | 93 (54.1%) |
| annotated KEGG                           | 16 (12.1%) | 60 (21.5%)  | 77 (20.8%)  | 33 (19.2%) |
