# Supplementary material for: Differential gene expression in Aspergillus fumigatus induced by human platelets in vitro
Source: PubMed Central journal article supplement (PMC4415150; doi:10.1016/j.ijmm.2015.01.002), 2015-05
Supplement: mmc3.pdf [file mmc3.pdf]

**A**

| Locus      | Protein name                                                 | sense primer<br>sequence 5'-3' | antisense primer<br>sequence 5'-3' |
|------------|--------------------------------------------------------------|--------------------------------|------------------------------------|
| Afu1g17270 | FRE family ferric-chelate reductase                          | AGCATCGTGCTCTGCCTG             | AAGAGAGGATCCCGGTGC                 |
| Afu2g02530 | casein kinase I                                              | CGGCCGTAAGATCGGAAG             | TGCTTGGCCTTGACGCTC                 |
| Afu2g09030 | secreted dipeptidyl peptidase DppV                           | GGACGCGAAGGTCTCAAC             | AACTGGAGGATCCGCTCG                 |
| Afu2g11510 | nucleolar GTP-binding protein (Nog1)                         | CGCCTTCTGAAGCTAGGC             | TGCCGATCGTGCGCTTTC                 |
| Afu2g13710 | NADH-ubiquinone oxidoreductase 49 kDa subunit                | GGTTTCGAGGAGCGTGAG             | AAGGCCAAGGGGAAGGTC                 |
| Afu3g02270 | mycelial catalase Cat1                                       | CTGGCCCGTGATGTTAC              | ACGGCGTGGATCAGATCG                 |
| Afu3g13110 | extracellular serine-threonine rich protein                  | CAGTGACAGCACCGGTTG             | TTGGAGGTGGAGAGGTGC                 |
| Afu4g01140 | MFS multidrug transporter                                    | AGGTGTTCTCGCTTCGG              | AGAAACGCCAGCAGCCAC                 |
| Afu4g11800 | Alkaline protease alp1                                       | TTCTGTCGTCGCTGCTGG             | AGTTGGAGAAGGAGGCCG                 |
| Afu5g02330 | major allergen and cytotoxin AspF1                           | CCACAGCCGTGTCTGTTC             | CTGTATAGAAGCCGTTGTC                |
| Afu5g13060 | DUF1275 domain protein                                       | CTACAACGCCTGGTCTGTG            | TCAGCGACTTGAGCCAGC                 |
| Afu6g03890 | spore-specific catalase CatA                                 | CGAATGACCGCCGAAGT              | TTCCGAATGCCAGTGC                   |
| Afu6g04800 | lysine decarboxylase-like protein                            | CGGCGAGGAAACATGGTC             | GTGGAATTCGTGGGCGAG                 |
| Afu6g07000 | hypothetical protein                                         | GCAACAAGCAACGGACCG             | GCCTGGTGTACGTGCATC                 |
| Afu6g09740 | thioredoxin reductase GliT                                   | GATGTCGCCAAGACCGTC             | TCAAGGCGAGCTGCTTGG                 |
| Afu7g00250 | beta tubulin                                                 | CTGTCGGTCCACCAGTTG             | GGTTGAGATCGCCGTACG                 |
| Afu7g02230 | mRNA binding post-transcriptional regulator (Csx1), putative | CATGCCCAACACCAACCG             | TCGTTGACTTCAGGGCCG                 |

**B**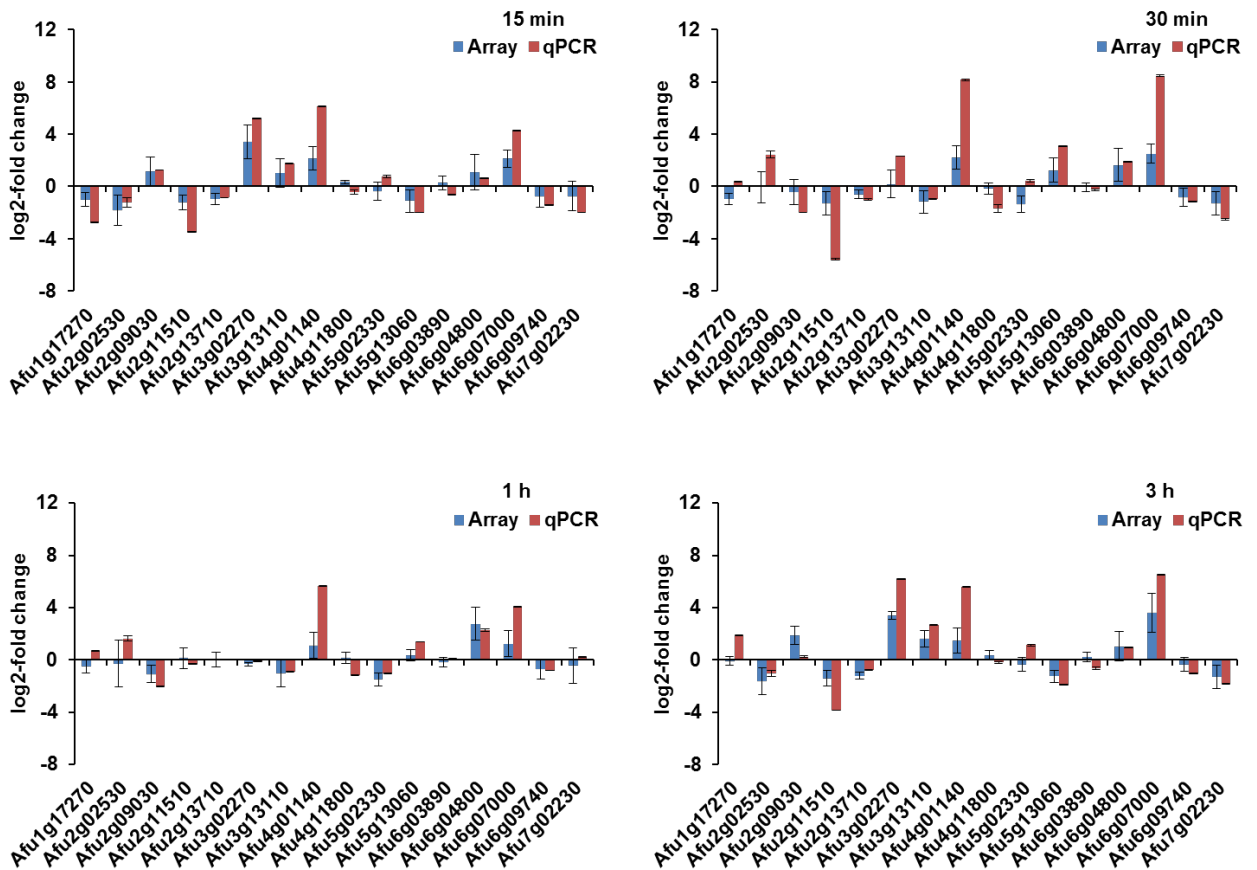

**Supplemental Figure 1: RT-qPCR Validation of microarray results.** (A) List of *A. fumigatus* gene identities and primers used for RT-qPCR analysis. (B) Fungal gene expression analysis (log<sub>2</sub>-fold change) after 15 min, 30 min, 1 h and 3 h of exposure to platelets as determined by microarrays in comparison to RT-qPCR analysis. Error bars indicate SEM.
