# Supplementary material for: Differential gene expression in Aspergillus fumigatus induced by human platelets in vitro
Source: PubMed Central journal article supplement (PMC4415150; doi:10.1016/j.ijmm.2015.01.002), 2015-05
Supplement: mmc4.pdf [file mmc4.pdf]

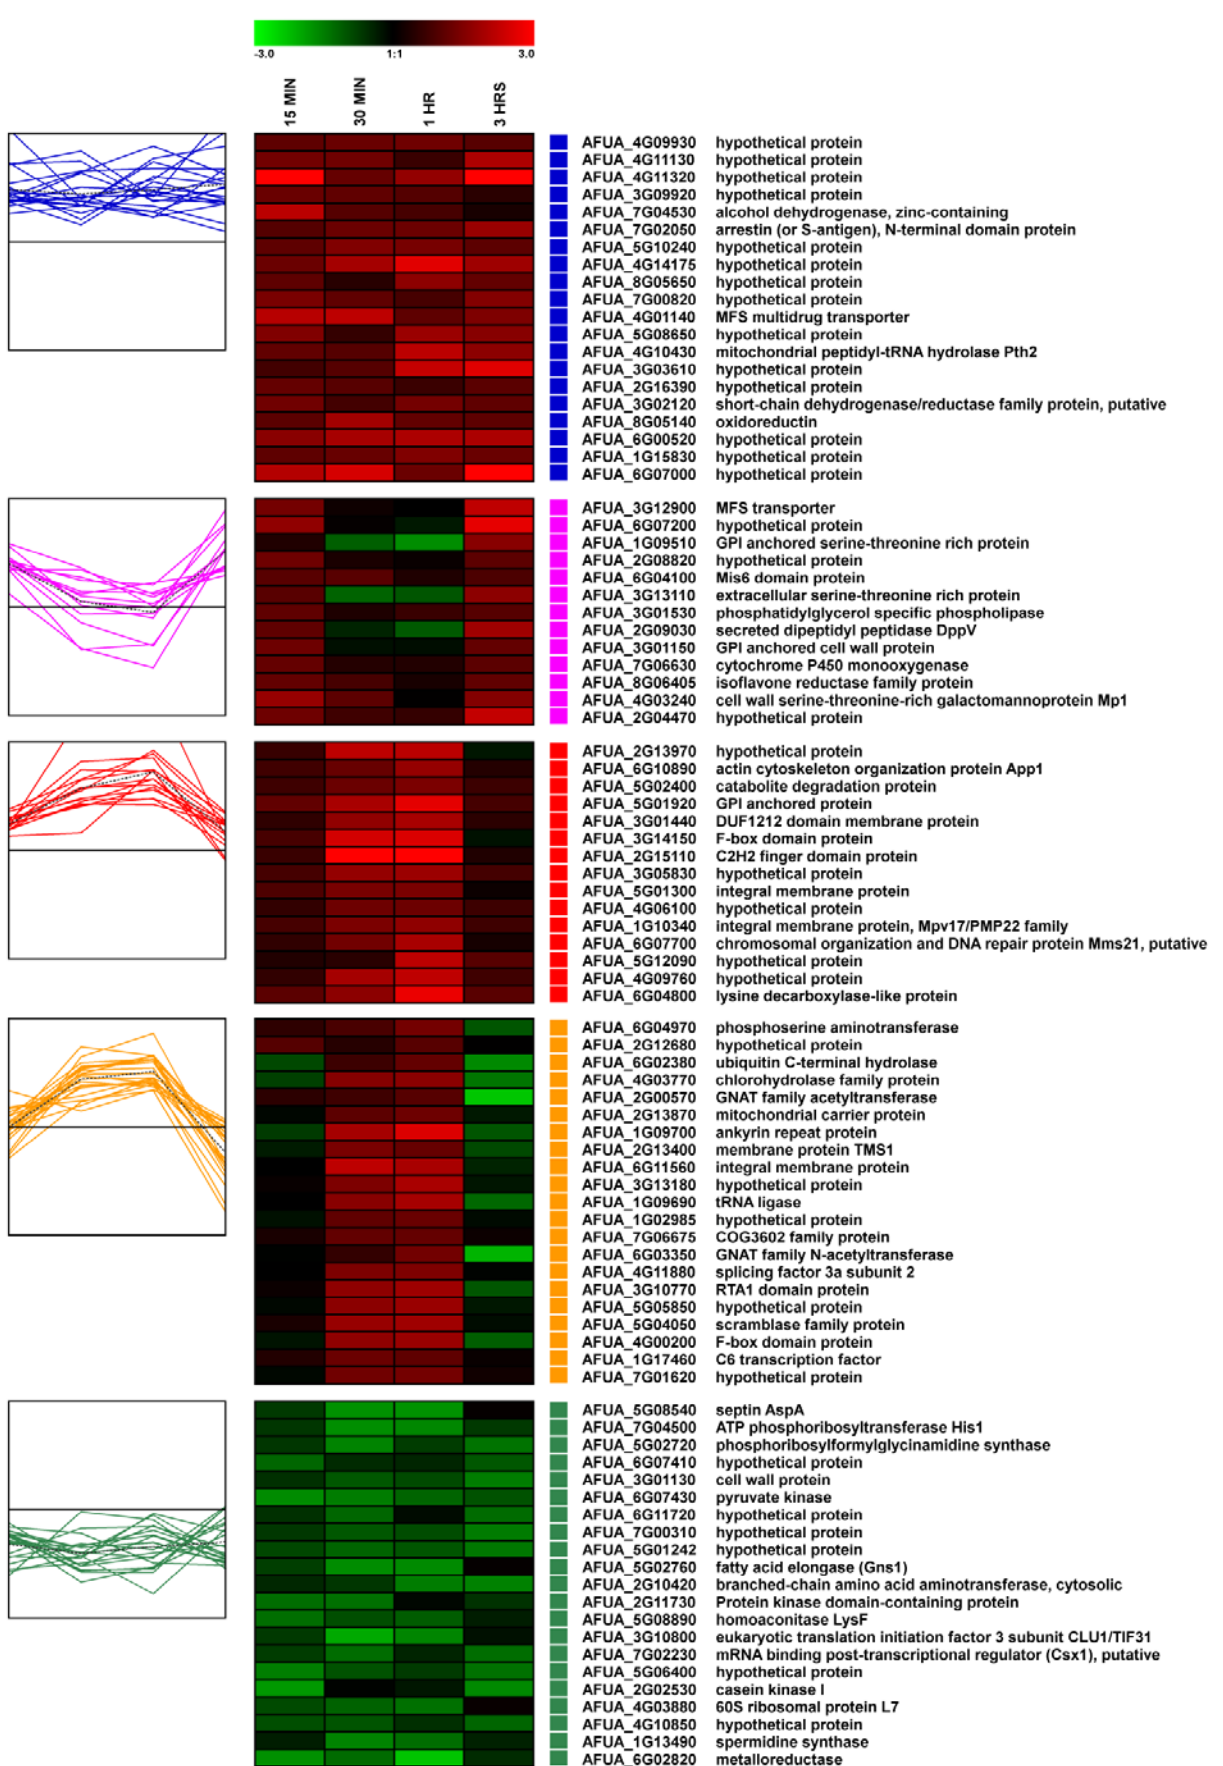

**Supplemental Figure 2:** K-means clustering of gene expression profiles of genes significantly ( $p < 0.05$ ) differentially expressed in *A. fumigatus* at least at two time points after exposure to platelets.
